# Supplementary material for: Phosphine ligand-coated Cu nanoparticle-catalyzed selective semihydrogenation of alkynes: electronic or hindrance effects of the ligand?
Source: Royal Society of Chemistry journal article supplement (doi:10.1039/d0cp02303e), 2020-01-01
Supplement: d0cp02303e1.pdf [file d0cp02303e1.pdf]

# **Phosphine Ligands-coated Cu Nanoparticle Catalyzed Selective Semihydrogenation of Alkynes: Electronic or Hindrance Effects of Ligand?**

Yafei Luo <sup>a§</sup>, Zheng Huang<sup>a§</sup>, Zhongzhu Chen <sup>a</sup>, Zhigang Xu <sup>a</sup>, Jianping Hu<sup>b,\*</sup>,  
Qingxi Meng <sup>c</sup>, Dianyong Tang <sup>a\*</sup>

<sup>a</sup> National & Local Joint Engineering Research Center of Targeted and Innovative Therapeutics, Chongqing Engineering Laboratory of Targeted and Innovative Therapeutics, Chongqing Key Laboratory of Kinase Modulators as Innovative Medicine, Chongqing Collaborative Innovation Center of Targeted and Innovative Therapeutics, College of Pharmacy & International Academy of Targeted Therapeutics and Innovation, Chongqing University of Arts and Sciences, Chongqing 402160, P. R. China.

Email: tangdy2008@163.com

<sup>b</sup> College of Pharmacy and Biological Engineering, Sichuan Industrial Institute of Antibiotics, Key Laboratory of Medicinal and Edible Plants Resources Development of Sichuan Education Department, Antibiotics Research and Re-evaluation Key Laboratory of Sichuan Province, Chengdu University, Chengdu, 610106, P. R. China

Email: hjpcdu@163.com

<sup>c</sup> College of Chemistry and Material Science, Shandong Agricultural University, Taian, Shandong, 271018, China.

§ These authors contributed equally to this work.

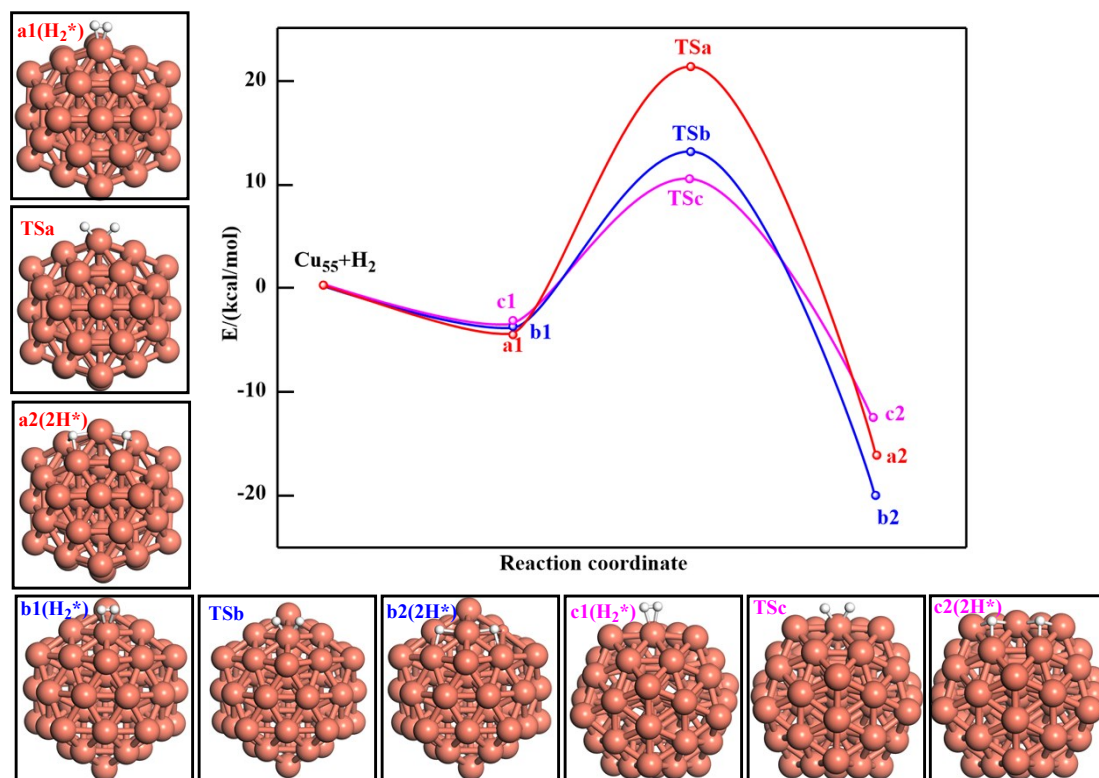

**Figure S1.** The representative pathways of H<sub>2</sub> dissociation at the top and edge sites of the Cu<sub>55</sub>. The \* represents the adsorption state.

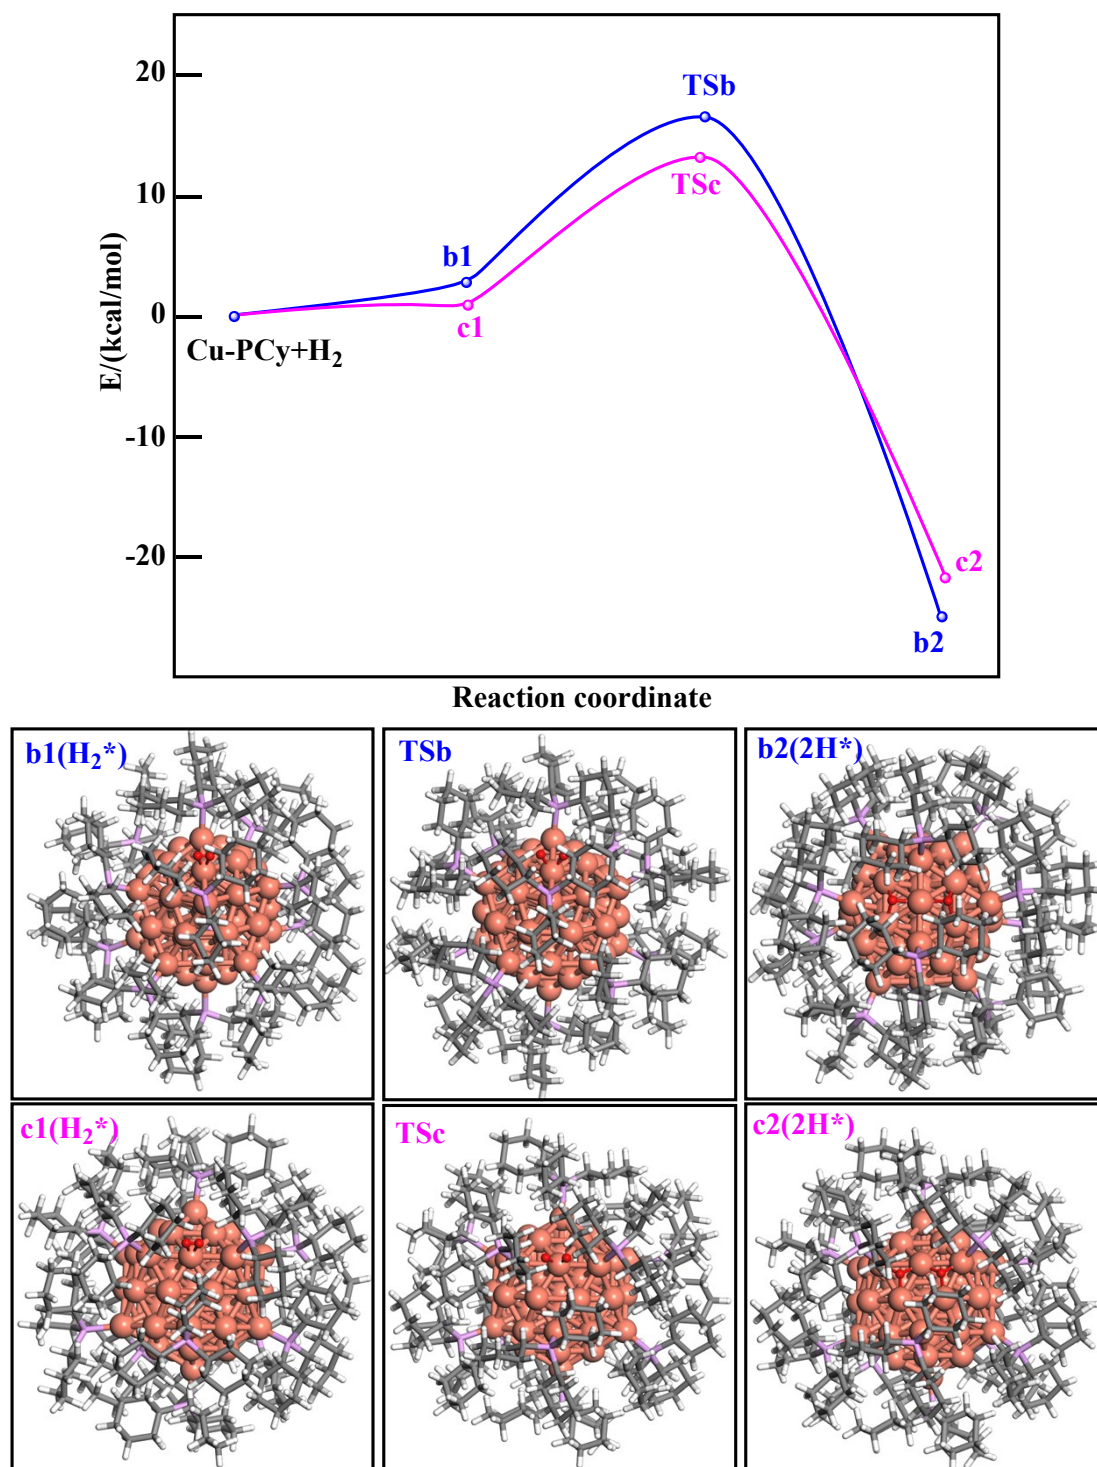

**Figure S2.** The representative pathways of H<sub>2</sub> dissociation at the top and edge sites of the Cu-PCy. (The \* represents the adsorption state. The H is labeled as red.)

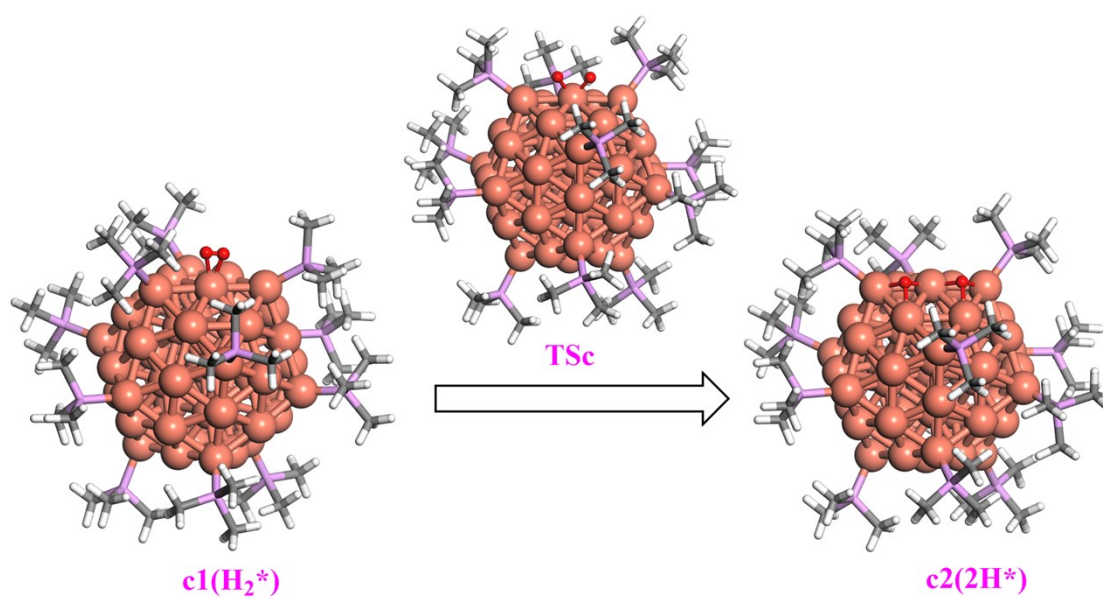

**Figure S3.** The representative pathways of H<sub>2</sub> dissociation at the top and edge sites of the Cu-PMe. (The \* represents the adsorption state. The H is labeled as red.)

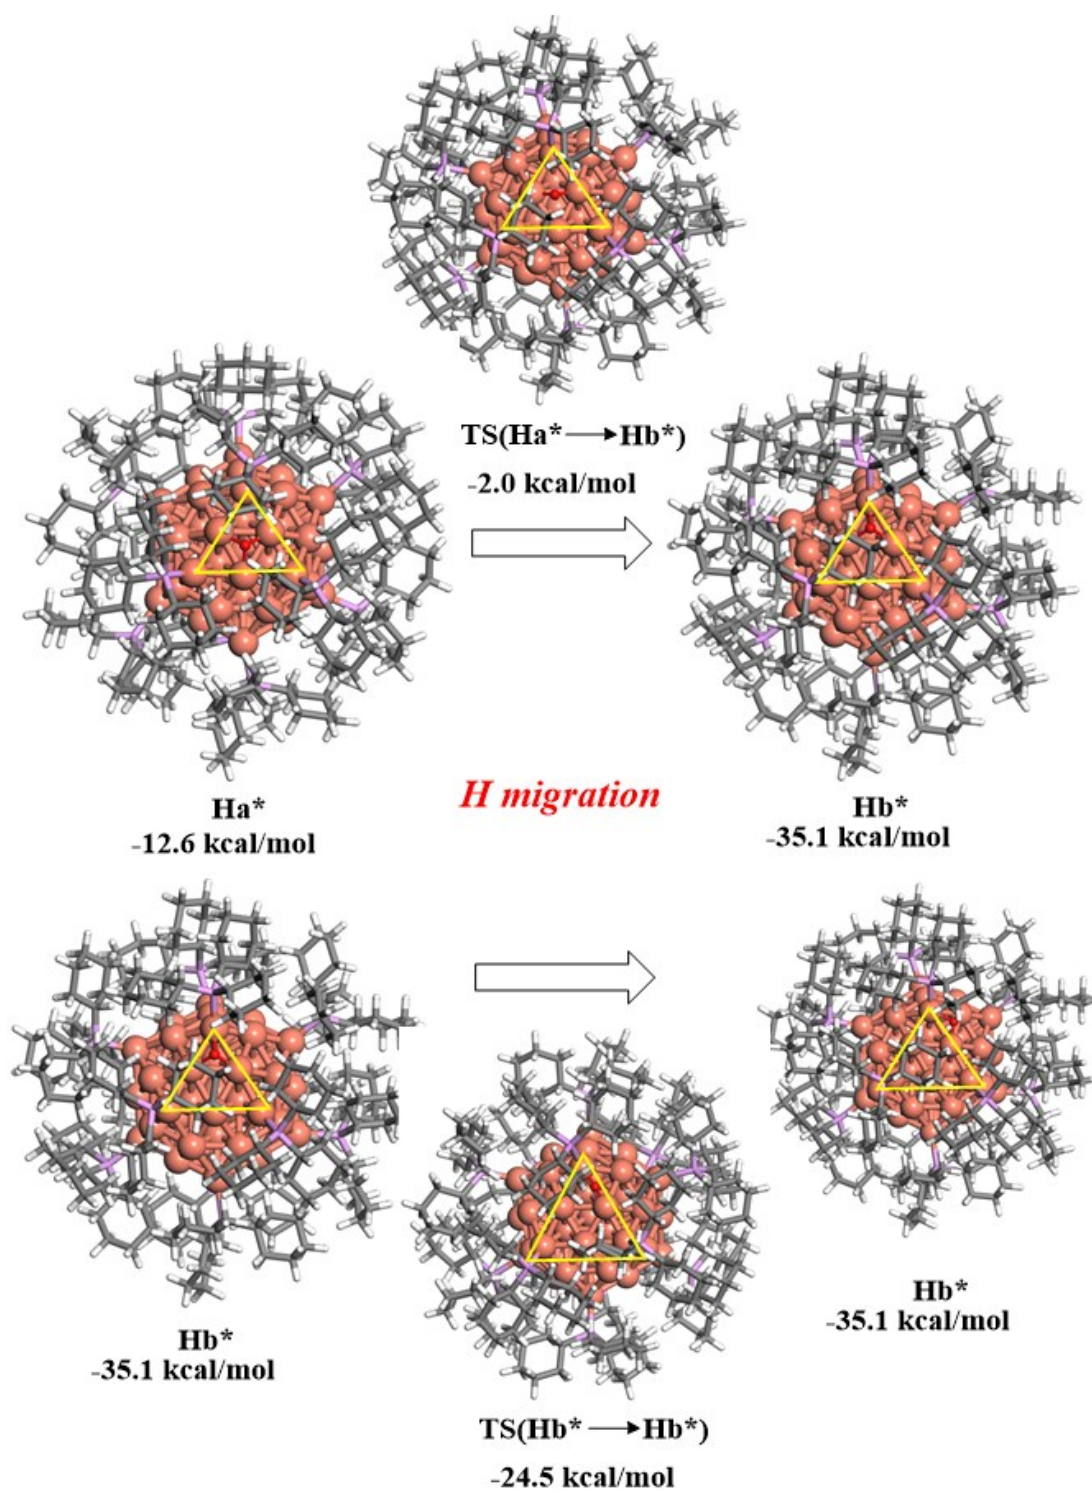

**Figure S4.** The representative pathways of diffusion of a H atom on the Cu-PCy. (The \* represents the adsorption state. The H is labeled as red.)

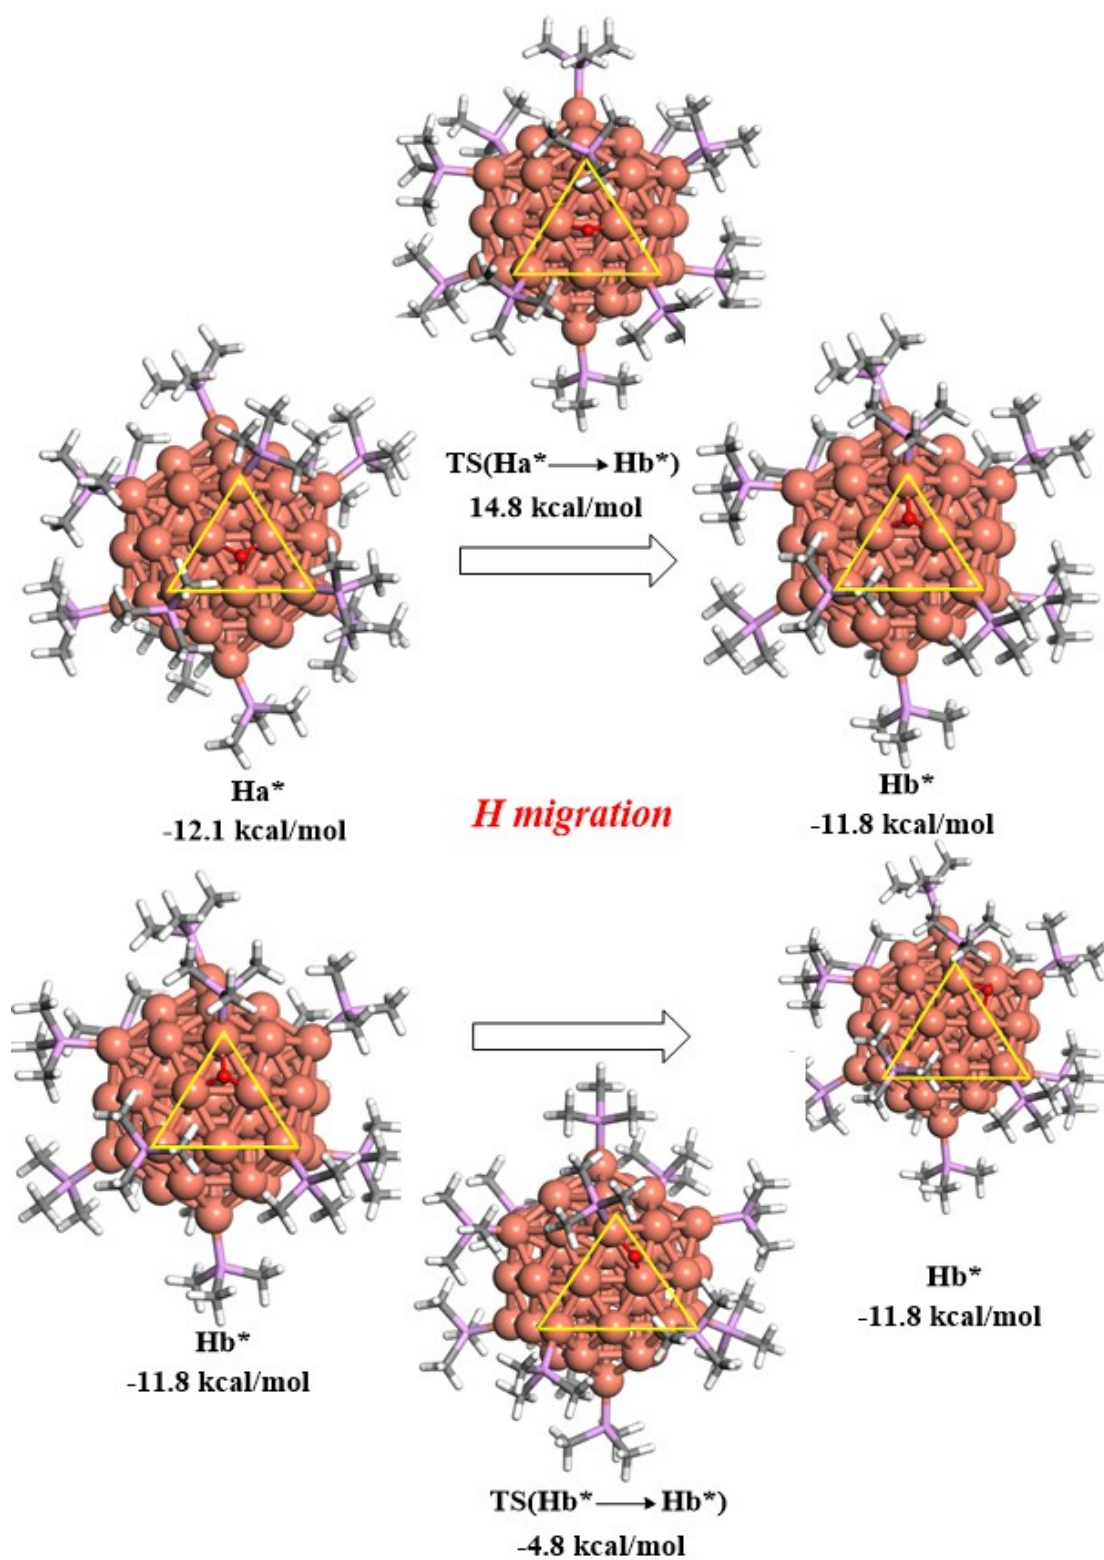

**Figure S5.** The representative pathways of diffusion of a H atom on the Cu-PMc. (The \* represents the adsorption state. The H is labeled as red.)

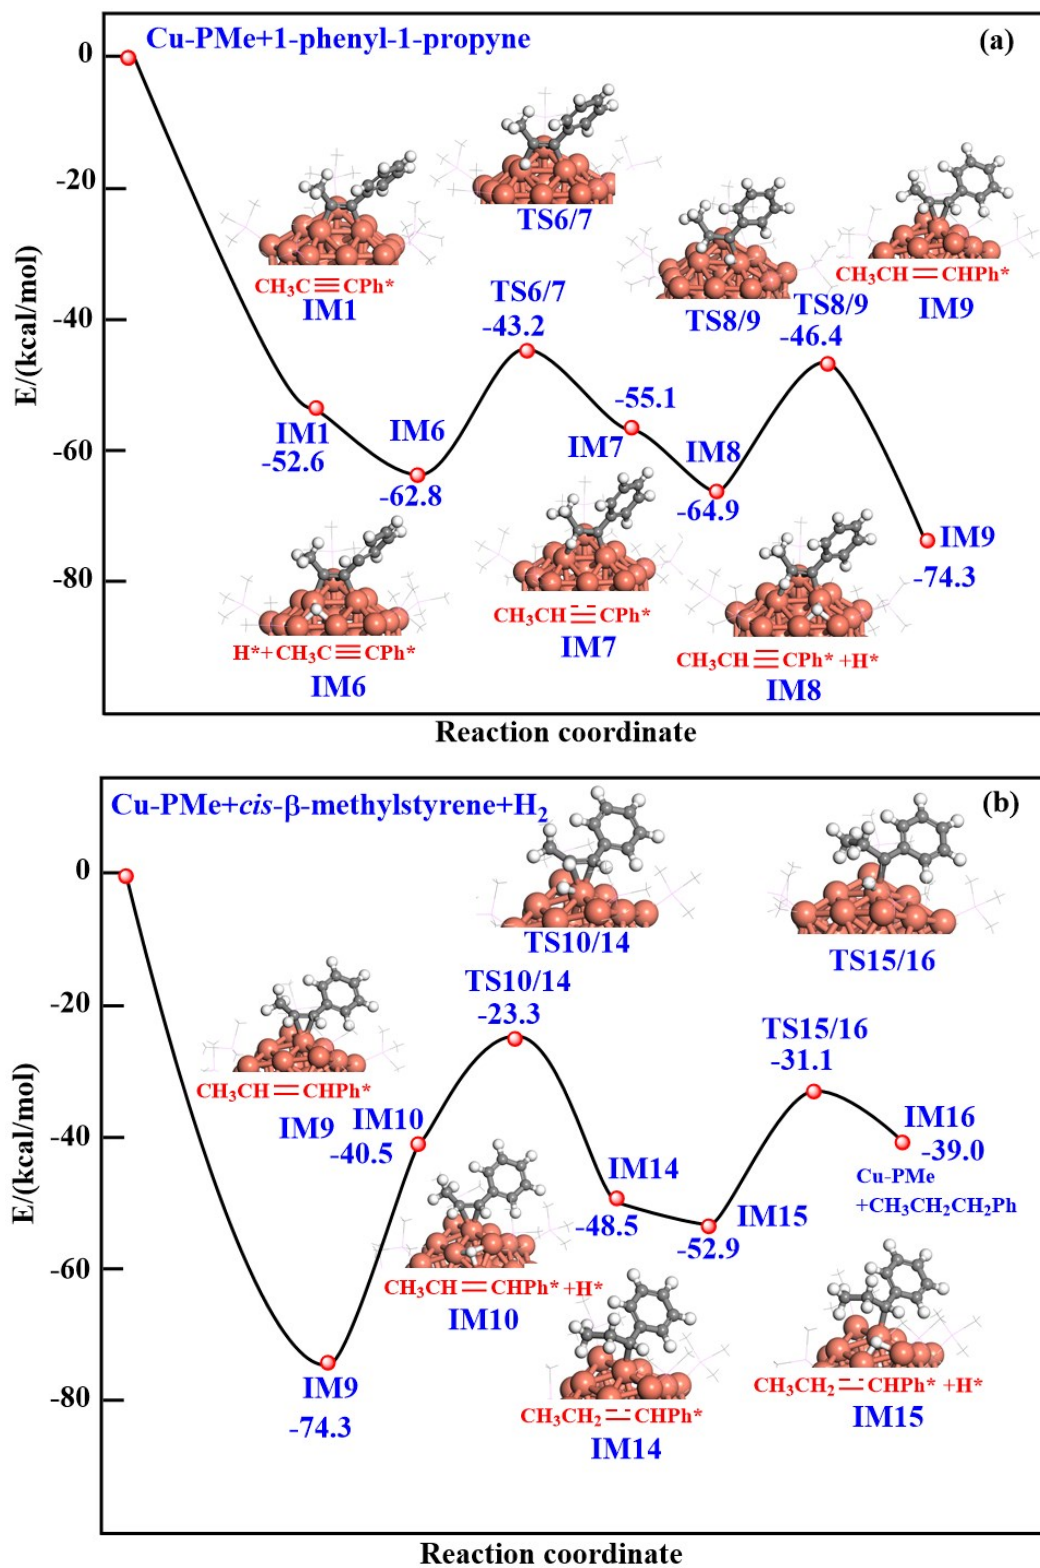

**Figure S6.** The potential energy profiles of the hydrogenation mechanism of the 1-phenyl-1-propyne (a) and *cis*-β-methylstyrene (b) catalyzed by the Cu-PMe. The \* represents the adsorption state.

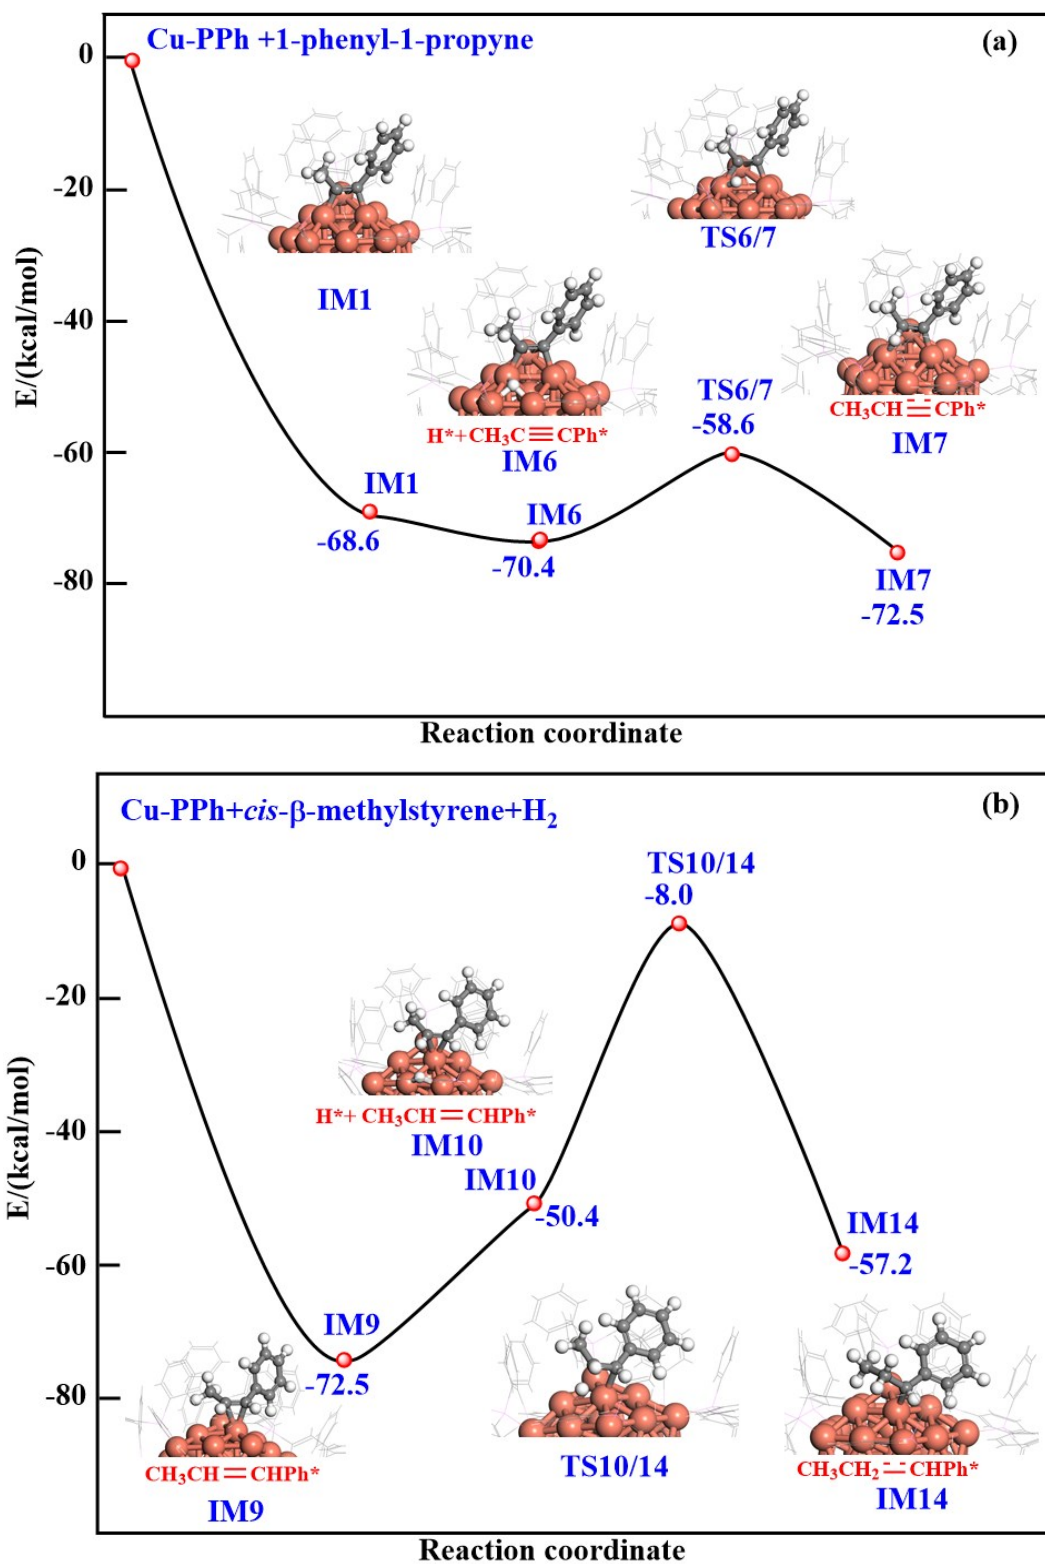

**Figure S7.** The potential energy profiles of the hydrogenation mechanism of the 1-phenyl-1-propyne (a) and *cis*- $\beta$ -methylstyrene (b) catalyzed by the Cu-PPh. The \* represents the adsorption state.



## Details for Energy Decomposition Analysis

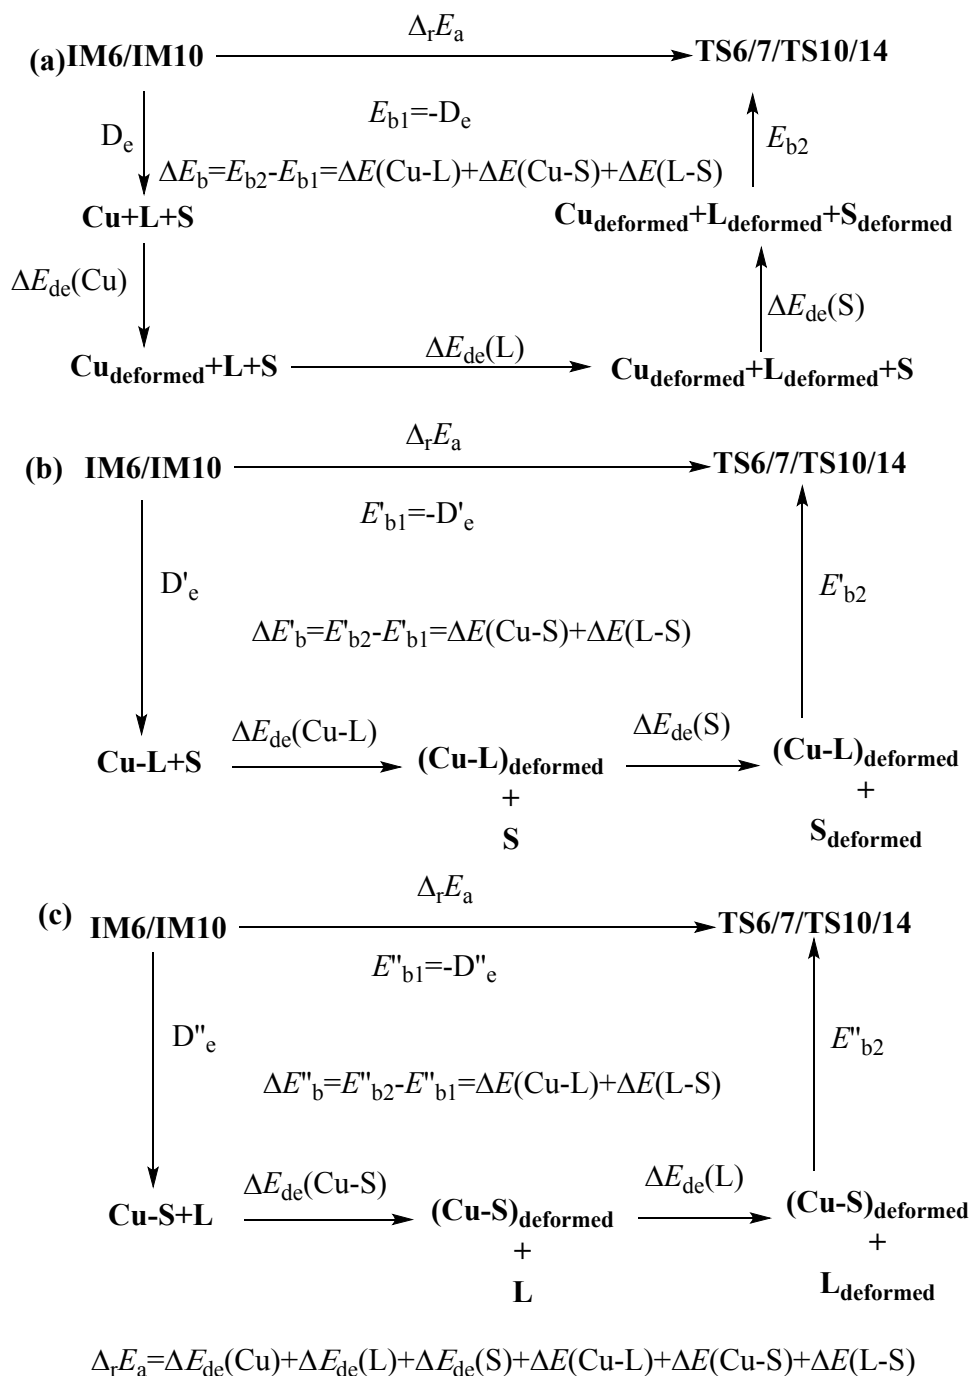

Cu is on behalf of Cu<sub>55</sub> fragment.

S is the substrate fragment.

L refers to the ligand fragment.

**Scheme S1.** Framework of energy decomposition analysis “**IM6/IM10** → **TS6/7/TS10/14**”.

In Scheme 1,  $D_e$  represented the energy required to dissociate the **IM6/IM10** into

Cu, L and S fragments.  $D_e$  represented the energy required to dissociate the **IM6/IM10** into Cu-L and S fragments.  $D'_e$  represented the energy required to dissociate the **IM6/IM10** into Cu-S and L fragments.  $\Delta E_{de}(L)$ ,  $\Delta E_{de}(Cu)$ ,  $\Delta E_{de}(S)$ ,  $\Delta E_{de}(Cu-L)$  and  $\Delta E_{de}(Cu-S)$  referred to the energy needed to deform the L, Cu, S, Cu-L and Cu-S fragments to the geometries they have in **TS6/7/TS10/14**, respectively. The interaction energies between the Cu and L fragments, between the Cu and S fragments and between the S and L fragments in the reactants and transition states were represented by  $\Delta E_{b1}$ ,  $\Delta E'_{b1}$  and  $\Delta E''_{b1}$  ( $\Delta E_{b1}$ ,  $\Delta E'_{b1}$  and  $\Delta E''_{b1} = -D_e$ ,  $-D'_e$  and  $-D''_e$ ) and  $\Delta E_{b2}$ ,  $\Delta E'_{b2}$  and  $\Delta E''_{b2}$ . Based on the  $\Delta E_{b1}$ ,  $\Delta E'_{b1}$  and  $\Delta E''_{b1}$  shown in Scheme 1, the interaction energies between the Cu and L fragments, between the Cu and S fragments and between the S and L fragments in the reactants and transition states can be achieved.

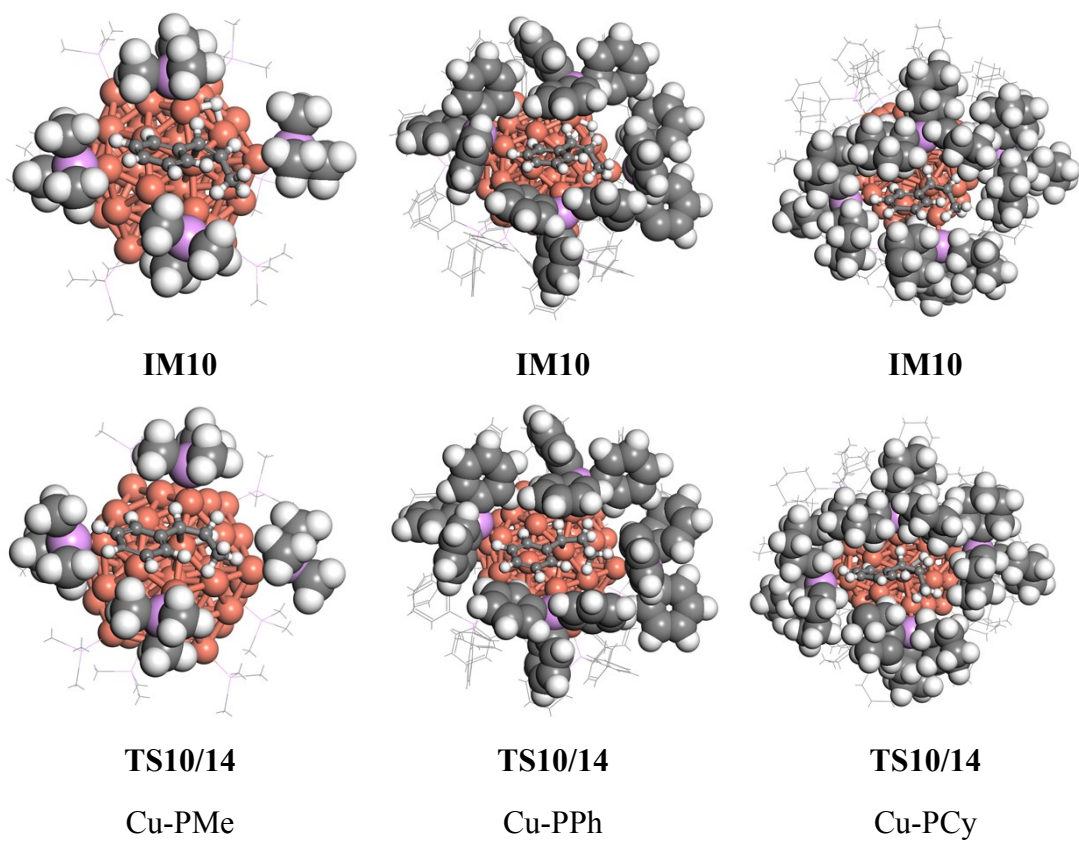

**Figure S8.** The optimized geometries of the **IM10** and **TS10/14**.

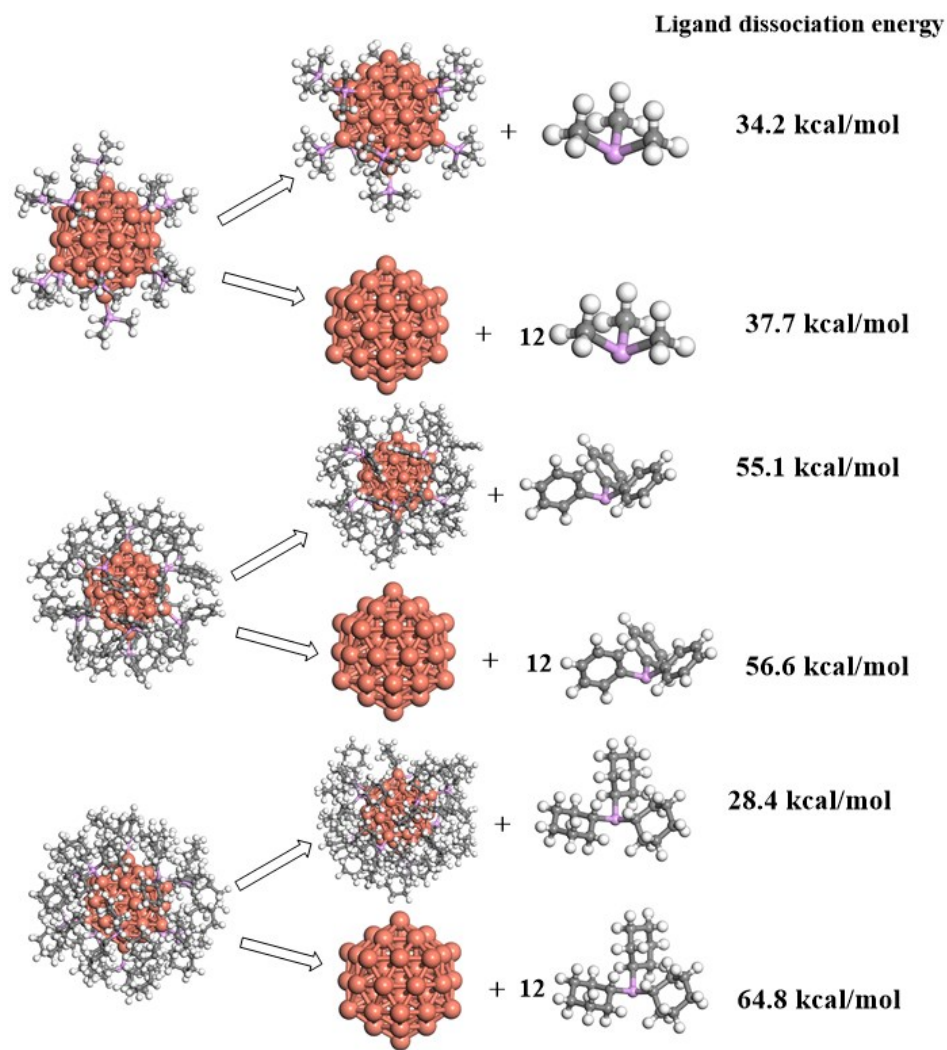

**Figure S9.** The ligand dissociation energies for the Cu-PMe, Cu-PPh and Cu-PCy.
